# Supplementary material for: A Multi-Methodological Protocol to Characterize PDO Olive Oils
Source: PubMed Central journal article supplement (PMC6160970; doi:10.3390/metabo8030043), 2018-07-28
Supplement: metabolites-08-00043-s001.pdf [file metabolites-08-00043-s001.pdf]

**Table S1.** Characteristics of olive oil samples.

| <b>Code</b> | <b>Geographical origin</b> | <b>Cultivar</b> | <b>Harvesting year</b> |
|-------------|----------------------------|-----------------|------------------------|
| 1           | Priverno                   | Itrana          | 2011-2012              |
| 2           | Sonnino                    | Itrana          | 2011-2012              |
| 3           | Sonnino                    | Itrana          | 2011-2012              |
| 4           | Terracina                  | Itrana          | 2011-2012              |
| 5           | Lenola                     | Itrana          | 2011-2012              |
| 6           | Gaeta                      | Itrana          | 2011-2012              |
| 7           | SS Cosma e Damiano         | Itrana          | 2011-2012              |
| 8           | Cisterna di Latina         | Itrana          | 2011-2012              |
| 9           | Cisterna di Latina         | Carolea         | 2011-2012              |
| 10          | Rocca Massima              | Itrana          | 2011-2012              |
| 11          | Sonnino                    | Itrana          | 2011-2012              |
| 12          | Maenza                     | Itrana          | 2011-2012              |
| 13          | Maenza                     | Itrana          | 2011-2012              |
| 14          | Sermoneta                  | Itrana          | 2011-2012              |
| 15          | Priverno                   | Itrana          | 2012-2013              |
| 16          | Sonnino                    | Itrana          | 2012-2013              |
| 17          | Sonnino                    | Itrana          | 2012-2013              |
| 18          | Terracina                  | Itrana          | 2012-2013              |
| 19          | Lenola                     | Itrana          | 2012-2013              |
| 20          | Gaeta                      | Itrana          | 2012-2013              |
| 21          | SS Cosma e Damiano         | Itrana          | 2012-2013              |
| 22          | Cisterna di Latina         | Itrana          | 2012-2013              |
| 23          | Rocca Massima              | Itrana          | 2012-2013              |
| 24          | Sonnino                    | Itrana          | 2012-2013              |
| 25          | Maenza                     | Itrana          | 2012-2013              |
| 26          | Maenza                     | Itrana          | 2012-2013              |
| 27          | Sermoneta                  | Itrana          | 2012-2013              |
| 28          | Cisterna di Latina         | Carolea         | 2012-2013              |
| 29          | Spigno S.                  | Itrana          | 2012-2013              |
| 30          | Spigno S.                  | Itrana          | 2012-2013              |
| 31          | Cisterna di Latina         | Itrana          | 2012-2013              |
| 32          | Terracina                  | Itrana          | 2012-2013              |
| 33          | Fondi                      | Itrana          | 2012-2013              |

|    |                    |                  |           |
|----|--------------------|------------------|-----------|
| 34 | Aprilia            | Itrana           | 2012-2013 |
| 35 | Itri               | Itrana           | 2012-2013 |
| 36 | Sonnino            | Itrana           | 2012-2013 |
| 37 | Terracina          | Itrana           | 2012-2013 |
| 38 | Itri               | Itrana           | 2012-2013 |
| 39 | Aprilia            | Itrana, Frantoio | 2012-2013 |
| 40 | Terracina          | Itrana           | 2012-2013 |
| 41 | Priverno           | Itrana           | 2013-2014 |
| 42 | Sonnino            | Itrana           | 2013-2014 |
| 43 | Sonnino            | Itrana           | 2013-2014 |
| 44 | Terracina          | Itrana           | 2013-2014 |
| 45 | Lenola             | Itrana           | 2013-2014 |
| 46 | Gaeta              | Itrana           | 2013-2014 |
| 47 | SS Cosma e Damiano | Itrana           | 2013-2014 |
| 48 | Rocca Massima      | Itrana           | 2013-2014 |
| 49 | Sonnino            | Itrana           | 2013-2014 |
| 50 | Maenza             | Itrana           | 2013-2014 |
| 51 | Minturno           | Itrana           | 2013-2014 |
| 52 | Sermoneta          | Itrana           | 2013-2014 |
| 53 | Castelforte        | Itrana           | 2013-2014 |
| 54 | Spigno S.          | Itrana           | 2013-2014 |
| 55 | Cisterna           | Itrana           | 2013-2014 |
| 56 | Terracina          | Itrana           | 2013-2014 |
| 57 | Lenola             | Itrana           | 2013-2014 |
| 58 | Aprilia            | Itrana           | 2013-2014 |
| 59 | Itri               | Itrana           | 2013-2014 |
| 60 | Sonnino            | Itrana           | 2013-2014 |
| 61 | Itri               | Itrana, Frantoio | 2013-2014 |
| 62 | Formia             | Itrana           | 2013-2014 |

**Table S2.** Chemical shifts and assignment of the thirteen NMR variables selected for ANOVA analysis.

|    | <b>Assignment</b>                                                       | <b>NMR Resonances (ppm)</b> |
|----|-------------------------------------------------------------------------|-----------------------------|
| 1  | Hexanal                                                                 | 9.704                       |
| 2  | Trans 2-hexenal                                                         | 9.454                       |
| 3  | Terpene 2                                                               | 4.885                       |
| 4  | Terpene 1                                                               | 4.541                       |
| 5  | Methynic protons in $\beta$ -glycerol moiety of sn-1,3 diglycerides     | 3.988                       |
| 6  | Methylenic protons in $\alpha$ -glycerol moiety of sn-1,2 diglycerides  | 3.636                       |
| R  | Reference peak due to methylenic protons bound to C2 normalized to 1000 | 2.251                       |
| 7  | Squalene                                                                | 1.620                       |
| 8  | Methylenic protons of all unsaturated fatty chains                      | 1.244                       |
| 9  | Methylenic protons of palmitic and stearic fatty chains                 | 1.197                       |
| 10 | 24-methylene cycloartanol                                               | 0.978                       |
| 11 | Methyl of linolenic fatty chains                                        | 0.910                       |
| 12 | Methyl of linoleic fatty chains                                         | 0.843                       |
| 13 | Methyl-18 of $\beta$ -sitosterol                                        | 0.623                       |
